# Supplementary material
Source: ML conference proceedings conference paper supplement (https://proceedings.neurips.cc/paper_files/paper/2022/hash/42beaab8aa8da1c77581609a61eced93-Abstract.html)
Supplement: Supplementary file 1 [file 42beaab8aa8da1c77581609a61eced93-Supplemental-Conference.zip]

Archive with 2 entries (2 files):
- GRASP_appendix.pdf
- __MACOSX/._GRASP_appendix.pdf
